# Supplementary material for: The SARS-CoV-2 Delta variant induces an antibody response largely focused on class 1 and 2 antibody epitopes
Source: PubMed Central journal article supplement (PMC9275729; doi:10.1371/journal.ppat.1010592), 2022-06-29

**A**

primary Delta infection

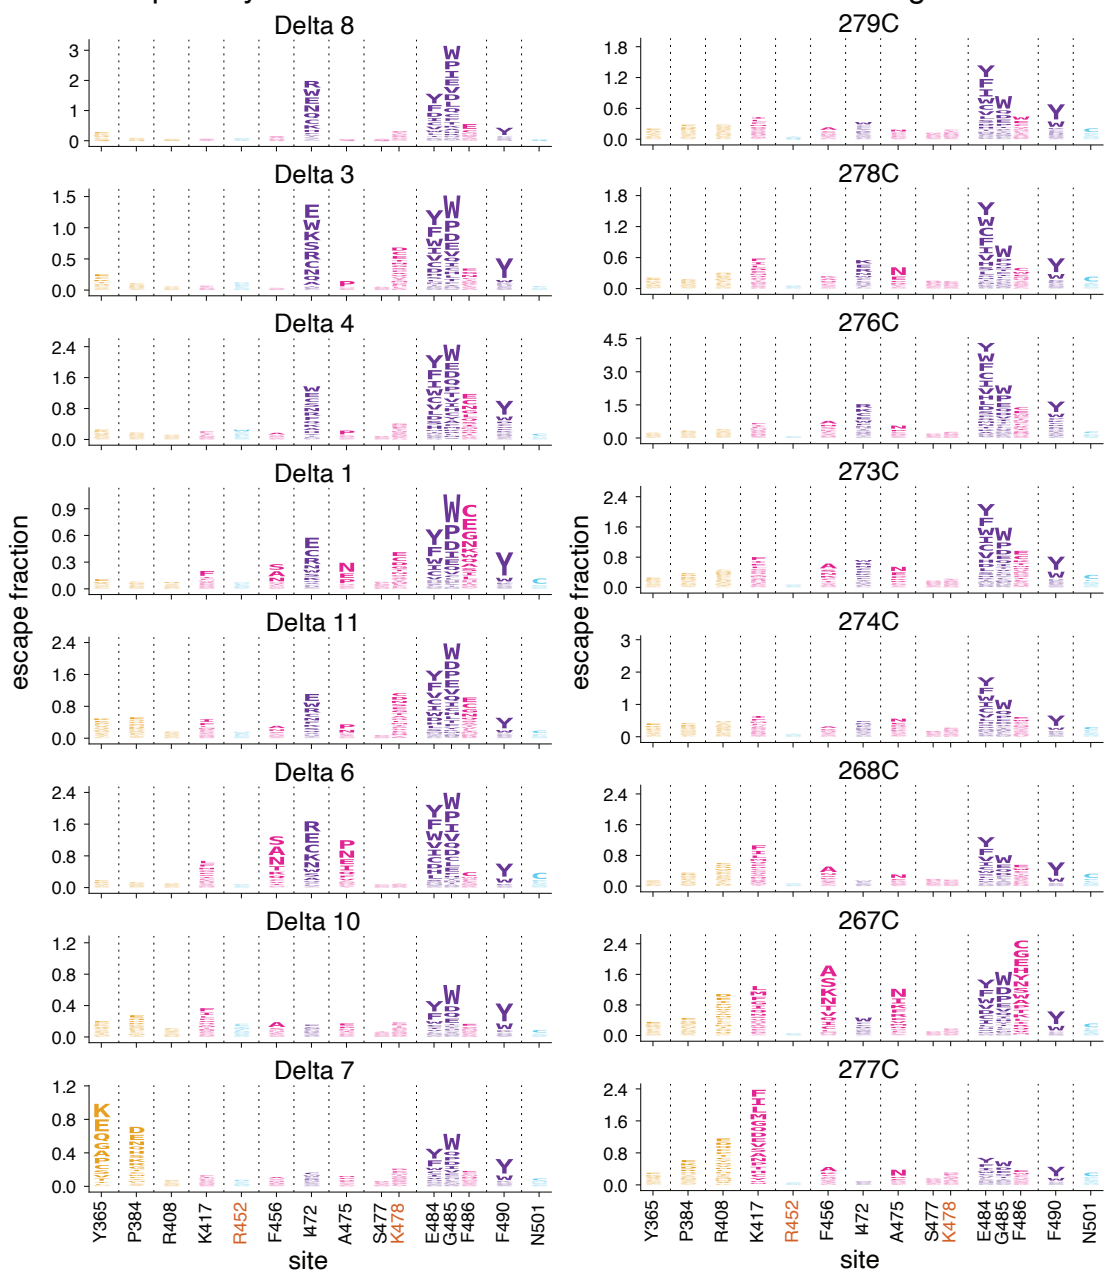**B**

2x BNT162b2 vaccination

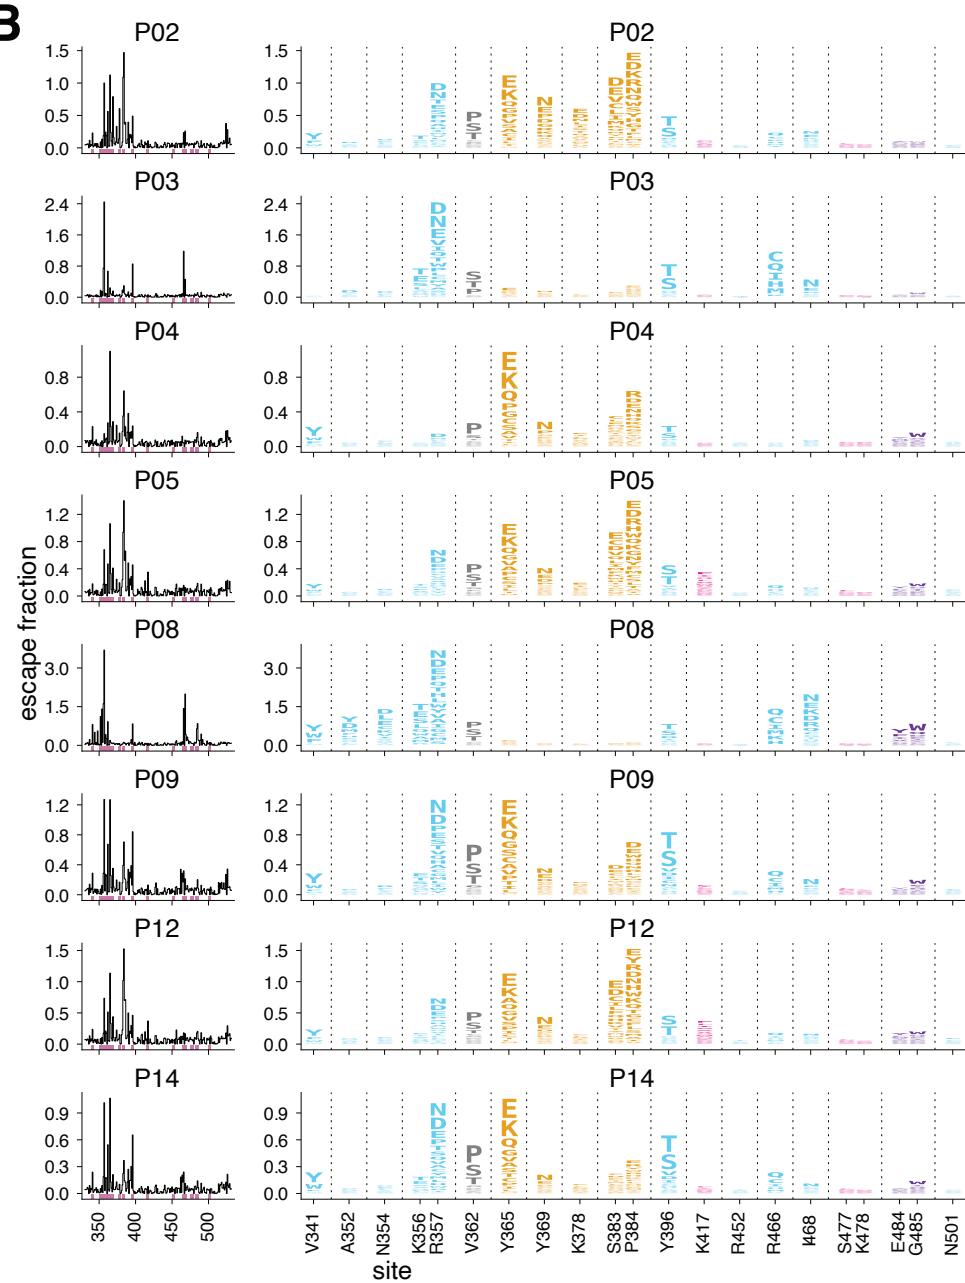**C**2x mRNA-1273 (n=22)  
Wuhan-Hu-1 library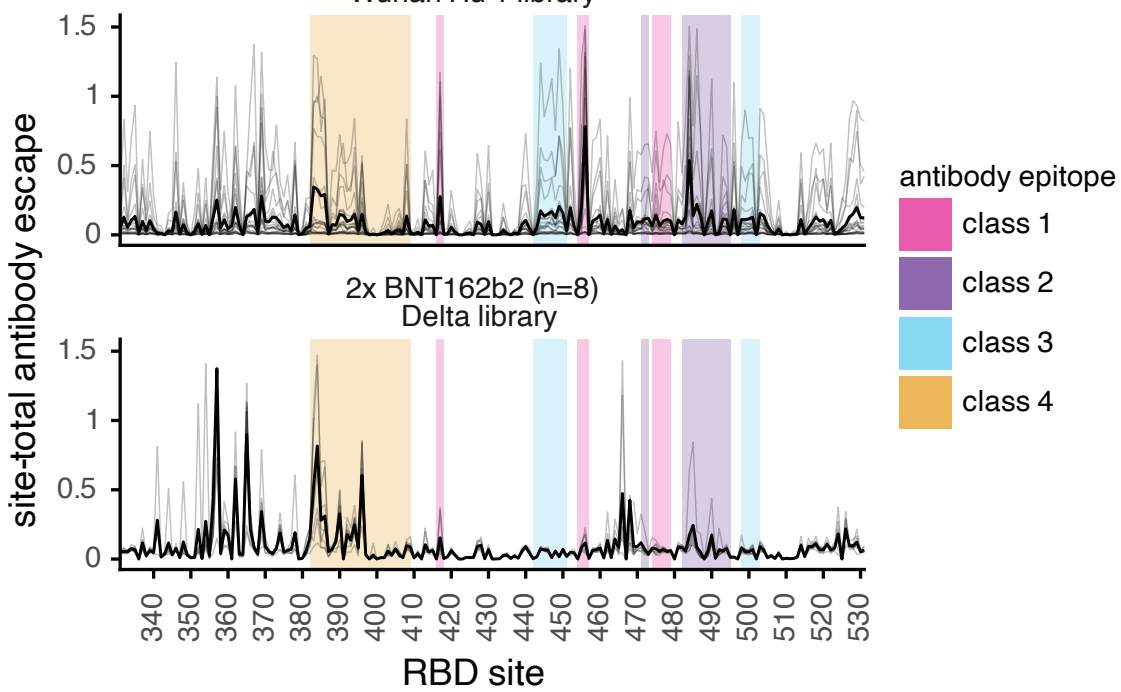**D**mutations that reduce  
binding to the Wuhan-Hu-1 RBD from  
2x mRNA-1273 sera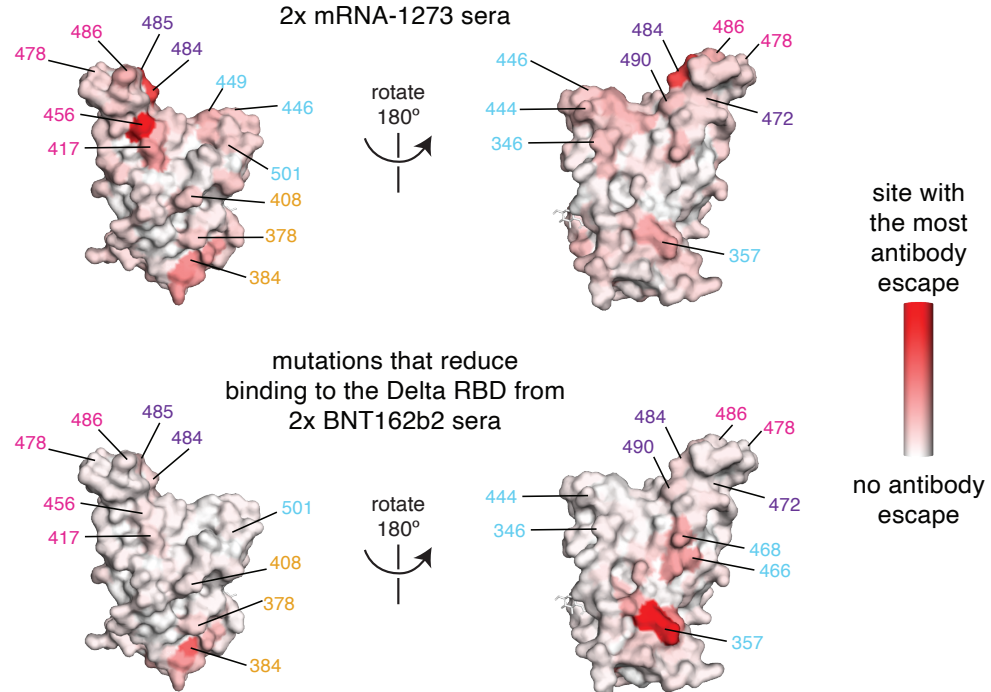

Supplement: ppat.1010592.s007.pdf [file ppat.1010592.s007.pdf]
